# Supplementary figures and images for: Photoreceptor PhyB Involved in Arabidopsis Temperature Perception and Heat-Tolerance Formation
Source: MDPI journal article supplement (doi:10.3390/ijms18061194), 2017-06-05

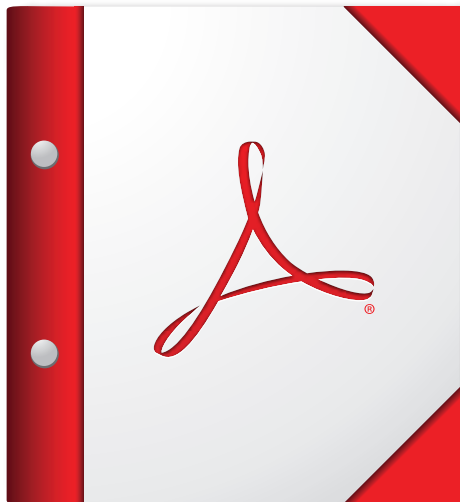

为获得最佳体验，请在 **Acrobat 9、Adobe Reader 9** 或更高版本中打开此 **PDF** 包。

[立即购买 Adobe Reader !](#)

Supplement: s1 [file s1]
